# Supplementary material for: α-Rhenabenzofuran with nonaromatic T0and aromatic S1states
Source: Royal Society of Chemistry journal article supplement (doi:10.1039/d2dt01001a), 2022-01-01
Supplement: d2dt01001a1.pdf [file d2dt01001a1.pdf]

## **$\alpha$ -Rhenabenzofuran with nonaromatic T<sub>0</sub> and aromatic S<sub>1</sub> states**

Junping Tang,<sup>a</sup> Yilun Wang,<sup>a,b</sup> Wei Bai,<sup>\*a</sup> Yan Zhou,<sup>c</sup> Wenyan Yu,<sup>a</sup> and Yang Li<sup>\* a,b</sup>

<sup>a</sup> State Key Laboratory of Fine Chemicals, Department of Chemistry, School of Chemical Engineering, Dalian University of Technology, Liaoning 116024, P.R. China

<sup>b</sup> School of Chemical Engineering, Dalian University of Technology, Panjin, Liaoning 124221, P.R. China

<sup>c</sup> School of Chemistry and Chemical Engineering, Guangxi University for Nationalities, Guangxi Key Laboratory of Chemistry and Engineering of Forest Products, Key Laboratory of Guangxi Colleges and Universities for Food Safety and Pharmaceutical Analytical Chemistry, Nanning, 530008, P.R. China

### **Supporting Information**

#### **Table of Contents**

|                                                                  |               |
|------------------------------------------------------------------|---------------|
| <b>1. NMR spectra and high-resolution mass spectroscopy data</b> | <b>S2-S4</b>  |
| <b>2. Computational details</b>                                  | <b>S5-S6</b>  |
| <b>3. X-ray crystallographic study of complex 2</b>              | <b>S7</b>     |
| <b>4. The Calculated Cartesian Coordinates</b>                   | <b>S8-S13</b> |
| <b>5. Reference</b>                                              | <b>S14</b>    |

## 1. NMR spectra and high-resolution mass spectroscopy data

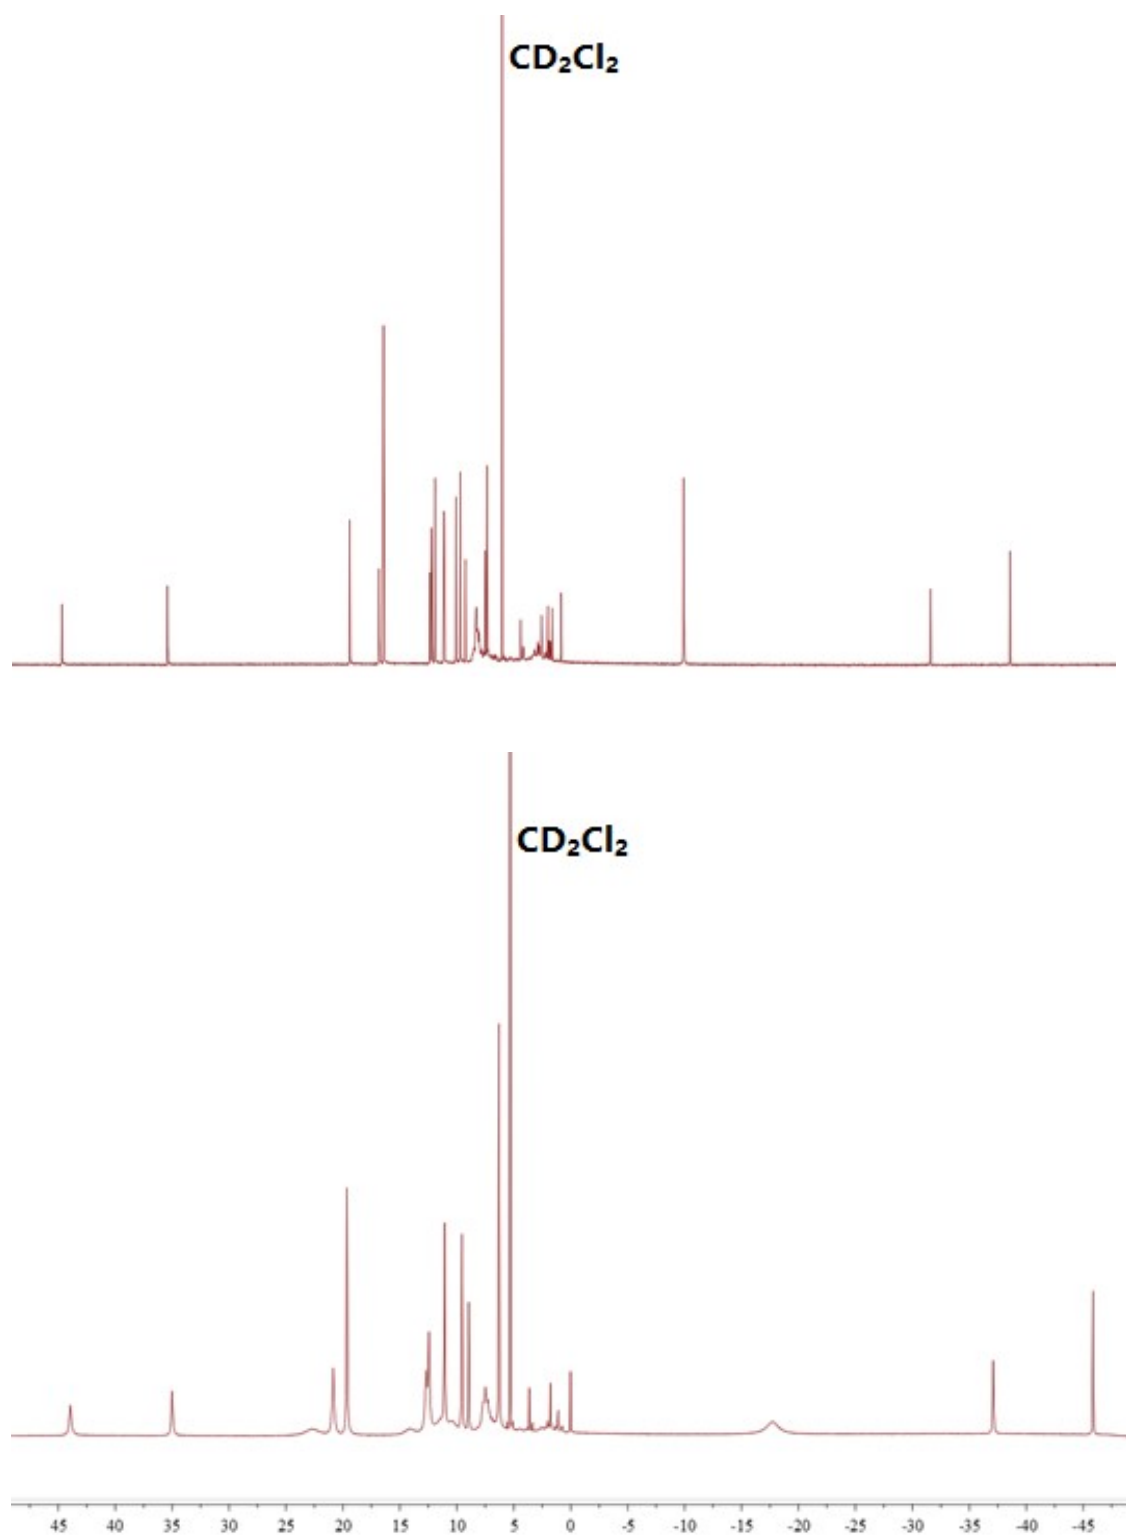

**Figure S1.**  $^1\text{H}$  NMR spectra of complex **2** at room temperature (above) and  $-80\text{ }^\circ\text{C}$  (below) in  $\text{CD}_2\text{Cl}_2$  at 400.1 MHz.

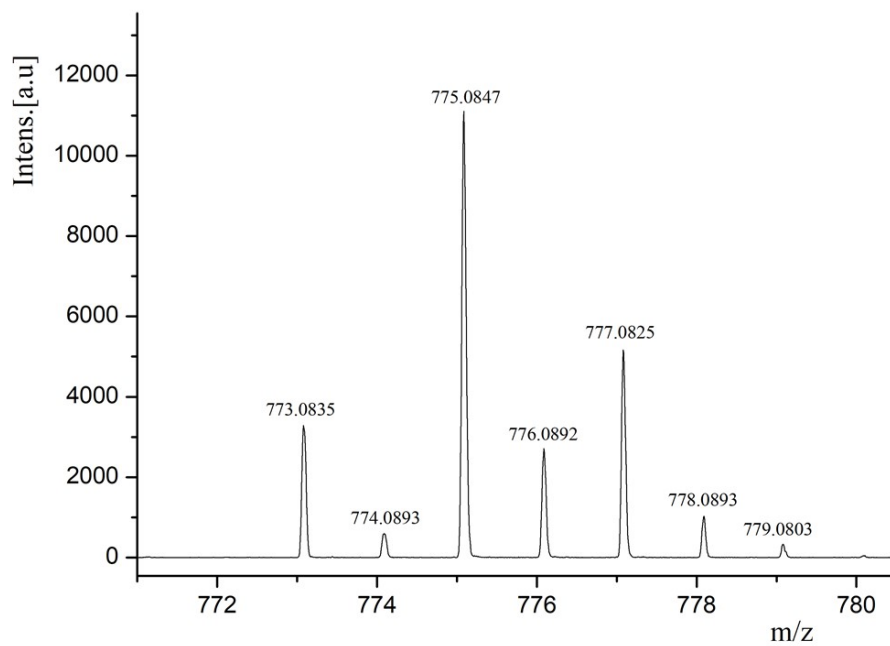

**Figure S2.** HRMS (ALDI-TOF) result of complex 2  $[M-Cl]^+$ .

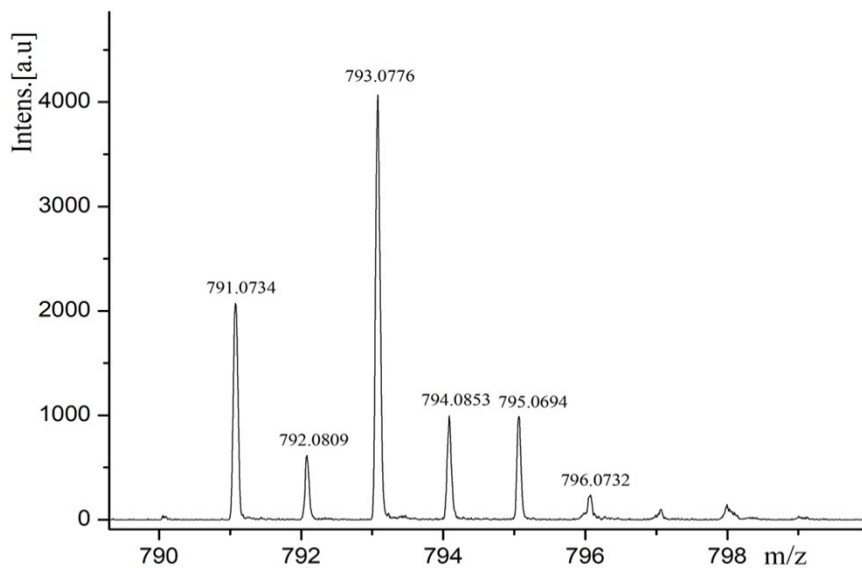

**Figure S3.** HRMS (ALDI-TOF) result of complex 3  $[M-Cl]^+$ .

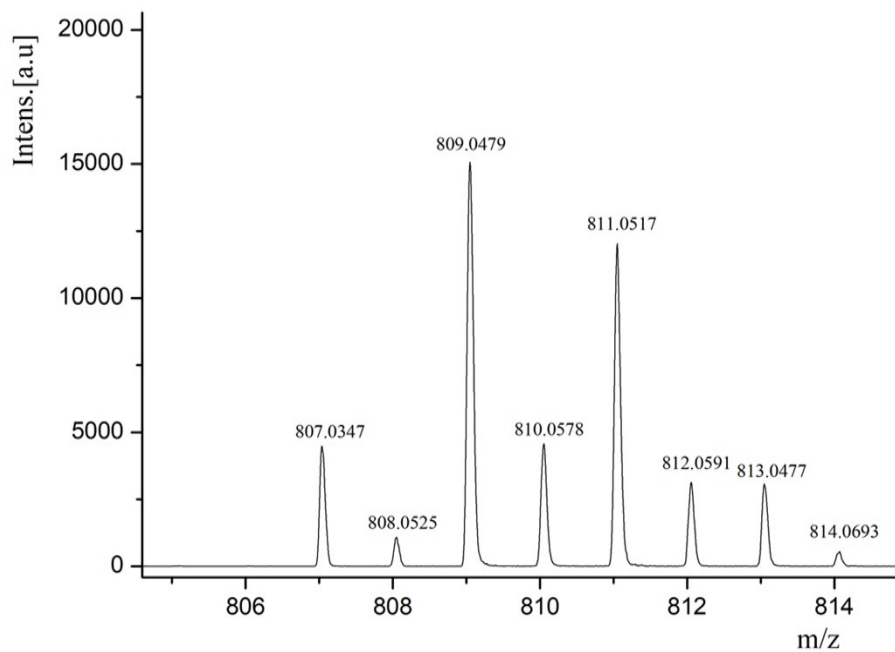

**Figure S4.** HRMS (ALDI-TOF) result of complex 4 [M-Cl]<sup>+</sup>.

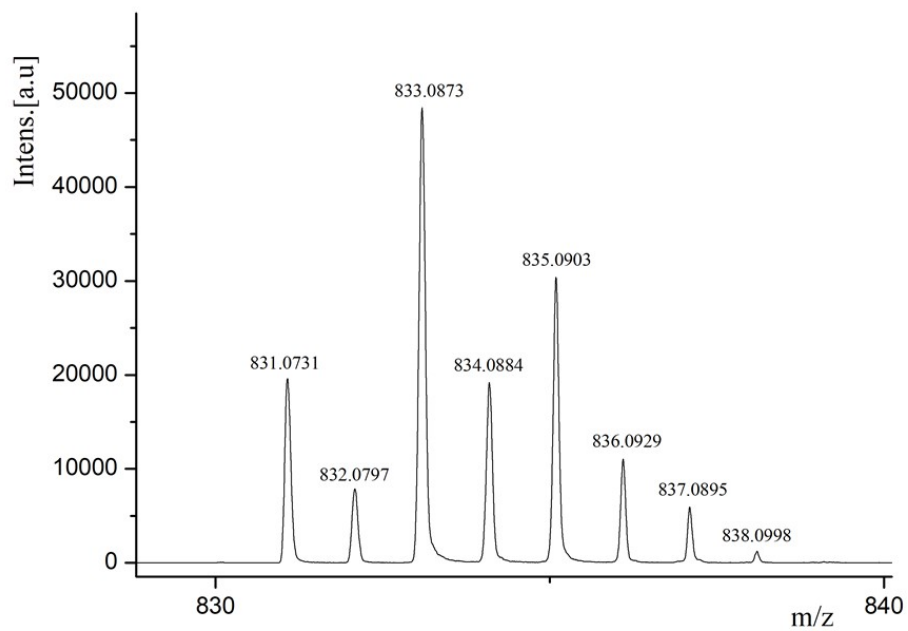

**Figure S5.** HRMS (ALDI-TOF) result of complex 5 [M-Cl]<sup>+</sup>.

## 2. Computational details

All the optimizations were performed with the Gaussian 16 software package.<sup>[4]</sup> All of these structures evaluated were optimized at the B3LYP level of density functional theory (DFT).<sup>[5]</sup> DFT/GENECP level had been done by implementing def2-TZVP basis set for Re atom.<sup>[6]</sup> On the other hand, 6-311G(2d,p) basis set had been used for the rest of atoms.<sup>[7]</sup> Nucleus-independent chemical shift (NICS) values were calculated at the B3LYP-GIAO//6-311G(2d,p)/def2-TZVP level.<sup>[8]</sup> The anisotropy of the current density was calculated with the AICD 2.0 program computing the NMR properties using the CSGT method with the Gaussian16 Rev A.03 program with the geometries previously obtained for **M**.<sup>[9]</sup> GIMIC analysis was finished by GIMIC code <sup>[10]</sup> based on the formatted check point file of Gaussian and rendered by ParaView visualization program.<sup>[11]</sup> Current densities were obtained from the wavefunction for GIAO NMR computations for a magnetic field applied perpendicular to the ring plane of the molecules within the context of the Quantum Theory of Atoms in Molecules using AIMAll.<sup>[12]</sup> Using RunEDDB script,<sup>[13]</sup> electron density of delocalized bond (EDDB)<sup>[14]</sup> based on natural atomic orbitals (NAOs) is analyzed. The molecular orbital composition and MO pictures were analyzed using Multiwfn, a multifunctional wavefunction analyzer.<sup>[15]</sup> The calculations of HOMA, MCI and ELF $\pi$  were also carried out by Multiwfn package. The MO pictures were drawn using the software of VMD.<sup>[16]</sup> VMD was developed by the Theoretical and Computational Biophysics Group in the Beckman Institute for Advanced Science and Technology at the University of Illinois at Urbana-Champaign (<http://www.ks.uiuc.edu/Research/vmd/>).

**Table S1.** The positive and negative values of total induced currents contributed by the diatropic and paratropic currents in the singlet and triplet states.

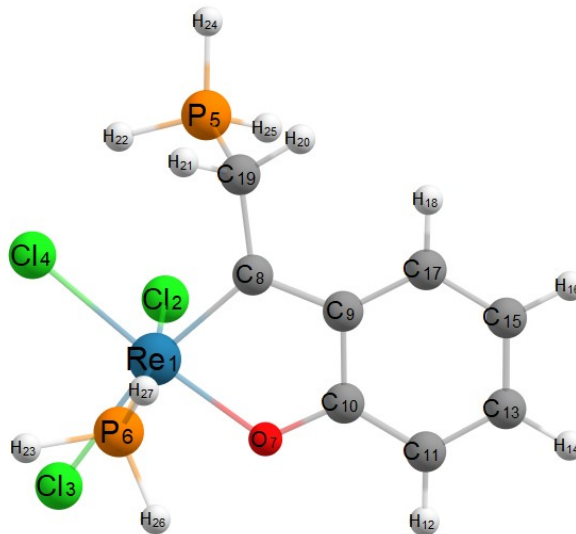

| Bond  | diatropic contribution( $S_1/T_0$ ) | paratropic contribution( $S_1/T_0$ ) | Total induced current ( $S_1/T_0$ ) |
|-------|-------------------------------------|--------------------------------------|-------------------------------------|
| 1-7   | 10.220204/6.639485                  | -5.770334/-7.066479                  | 4.449870/-0.426994                  |
| 7-10  | 11.677843/8.198671                  | -6.848873/-8.365040                  | 4.828970/-0.166369                  |
| 10-11 | 12.967212/11.992386                 | -4.209623/-4.523966                  | 8.757588/7.468421                   |
| 11-13 | 14.573696/13.622006                 | -5.690694/-6.003618                  | 8.883001/7.618389                   |
| 13-15 | 14.326973/13.366617                 | -5.354122/-5.703843                  | 8.972850/7.662775                   |
| 15-17 | 14.718166/13.817001                 | -5.807493/-6.186534                  | 8.910673/7.630467                   |
| 17-9  | 13.550121/12.879307                 | -6.058419/-6.476036                  | 7.491702/6.403271                   |
| 9-8   | 11.061803/8.498420                  | -6.715433/-8.545832                  | 4.346370/-0.047411                  |
| 8-1   | 9.421343/6.956005                   | -5.271217/-6.921324                  | 4.150125/0.034681                   |

### 3. X-ray crystallographic study of complex 2

**Table S2.** Crystallographic data and refinement details for **2**

|                                                    | <b>2</b>                                                           |
|----------------------------------------------------|--------------------------------------------------------------------|
| CCDC Number                                        | 2128119                                                            |
| Empirical formula                                  | C <sub>34</sub> H <sub>31</sub> OP <sub>2</sub> Cl <sub>3</sub> Re |
| Color & habit                                      | brown, block                                                       |
| Crystal size (mm <sup>3</sup> )                    | 0.10 x 0.10 x 0.10                                                 |
| Temperature (K)                                    | 120K                                                               |
| Crystal system                                     | triclinic                                                          |
| Space group                                        | <i>P</i> -1                                                        |
| a(Å)                                               | 9.653(3)                                                           |
| b(Å)                                               | 9.994(3)                                                           |
| c(Å)                                               | 17.068(5)                                                          |
| α(°)                                               | 96.175(11)                                                         |
| β(°)                                               | 99.797(11)                                                         |
| γ(°)                                               | 95.144(11)                                                         |
| V(Å <sup>3</sup> ), Z                              | 1603.3(9), 2                                                       |
| D <sub>cal</sub> (Mg/m <sup>3</sup> )              | 1.678                                                              |
| Abs. coeff.(mm <sup>-1</sup> )                     | 4.166                                                              |
| 2θ range for data collection (°)                   | 2.44 to 50.854                                                     |
| Reflections collected                              | 20984                                                              |
| Indep. Reflection, R(int)                          | 5785, 0.0552                                                       |
| Completeness of data                               | 97.6 %                                                             |
| Data/ restraints / parameters                      | 5785/0/372                                                         |
| Goodness-of-fit on F <sup>2</sup>                  | 1.088                                                              |
| R1 [I>2σ(I)], wR2                                  | 0.0331, 0.0898                                                     |
| R1 (all data), wR2                                 | 0.0380, 0.0934                                                     |
| Largest diff. peak and hole (e • Å <sup>-3</sup> ) | 0.70, -1.29                                                        |

#### 4. The Calculated Cartesian Coordinates with Electronic Energies

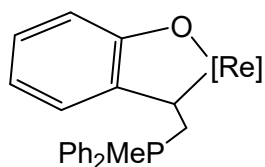

**2 (S<sub>1</sub>)**

[Re] = Re(PMePh<sub>2</sub>)Cl<sub>3</sub>

E = -3532.41909865 A.U.

|    |             |             |             |
|----|-------------|-------------|-------------|
| Re | -1.08845100 | -0.69431600 | -1.22195600 |
| Cl | 0.10827400  | -2.48947600 | -2.43138700 |
| Cl | -3.15211400 | -1.53162000 | -2.09806700 |
| Cl | -0.22756000 | 0.81464600  | -2.84961200 |
| P  | 2.95390500  | 0.04384400  | -0.46590100 |
| P  | -2.45649600 | 1.13746800  | -0.42327900 |
| O  | -1.45547900 | -2.12279800 | 0.23258400  |
| C  | 0.21367300  | -0.27910300 | 0.23497600  |
| C  | 0.10660000  | -0.97884300 | 1.47596800  |
| C  | -0.85952600 | -2.01634900 | 1.37922300  |
| C  | -1.10224500 | -2.87040800 | 2.47295800  |
| H  | -1.83403700 | -3.66212700 | 2.37342000  |
| C  | -0.40560900 | -2.66462900 | 3.64483300  |
| H  | -0.59222000 | -3.31026800 | 4.49577000  |
| C  | 0.54170100  | -1.62820500 | 3.76360300  |
| H  | 1.06902500  | -1.48823500 | 4.69932100  |
| C  | 0.79800000  | -0.79877700 | 2.69252300  |
| H  | 1.52862500  | -0.00498100 | 2.80102500  |
| C  | 1.33418700  | 0.72999500  | 0.09780200  |
| H  | 1.54076300  | 1.22849000  | 1.04824600  |
| H  | 1.10589200  | 1.50411500  | -0.63539700 |
| C  | 4.18989100  | 1.34509500  | -0.17637400 |
| C  | 4.23686200  | 2.01439100  | 1.05214800  |
| H  | 3.54148800  | 1.76410500  | 1.84319800  |
| C  | 5.17920300  | 3.00937100  | 1.27306600  |
| H  | 5.20493100  | 3.52069100  | 2.22737000  |
| C  | 6.08236100  | 3.34994900  | 0.27164200  |
| H  | 6.81451000  | 4.12934900  | 0.44427600  |
| C  | 6.04160500  | 2.69197300  | -0.95132200 |
| H  | 6.74001200  | 2.95565400  | -1.73583200 |
| C  | 5.10138400  | 1.69377400  | -1.17658800 |
| H  | 5.08162000  | 1.19563700  | -2.13637300 |
| C  | 2.91341100  | -0.34369000 | -2.22657900 |
| H  | 2.68776300  | 0.55084000  | -2.80448100 |
| H  | 2.12121300  | -1.07813200 | -2.40945600 |



|   |             |             |             |
|---|-------------|-------------|-------------|
| H | 3.87537900  | -0.76680200 | -2.51688100 |
| C | 3.44175700  | -1.46002800 | 0.41108800  |
| C | 4.50790200  | -1.46799500 | 1.31491500  |
| H | 5.06976100  | -0.56498600 | 1.51337700  |
| C | 4.85905700  | -2.64766200 | 1.95796500  |
| H | 5.68690100  | -2.65140000 | 2.65644000  |
| C | 4.15212600  | -3.81721500 | 1.70263200  |
| H | 4.42681400  | -4.73559000 | 2.20764700  |
| C | 3.09589800  | -3.81156500 | 0.79814500  |
| H | 2.54184400  | -4.71935900 | 0.59568400  |
| C | 2.73462000  | -2.63991400 | 0.14747900  |
| H | 1.90702200  | -2.65634200 | -0.55470000 |
| C | -3.77377100 | 0.81964400  | 0.83337400  |
| C | -4.11290800 | -0.48388100 | 1.19596400  |
| H | -3.57935300 | -1.31854000 | 0.76388200  |
| C | -5.14292500 | -0.71368900 | 2.10405700  |
| H | -5.39598700 | -1.73171000 | 2.37525200  |
| C | -5.84354700 | 0.35008200  | 2.65605900  |
| H | -6.64532600 | 0.16746500  | 3.36216300  |
| C | -5.51326400 | 1.65412700  | 2.29813800  |
| H | -6.05615000 | 2.49040200  | 2.72321500  |
| C | -4.48681200 | 1.88662900  | 1.39351900  |
| H | -4.23573100 | 2.90751400  | 1.13090900  |
| C | -1.52699600 | 2.54896400  | 0.31884100  |
| C | -1.03513400 | 3.58518800  | -0.48013300 |
| H | -1.23722900 | 3.59570900  | -1.54266400 |
| C | -0.27231000 | 4.60882800  | 0.07424900  |
| H | 0.09381300  | 5.40691800  | -0.56113100 |
| C | 0.01342900  | 4.61223100  | 1.43424900  |
| H | 0.59909000  | 5.41508800  | 1.86679200  |
| C | -0.46621400 | 3.58239600  | 2.23814700  |
| H | -0.25720000 | 3.57904400  | 3.30185700  |
| C | -1.22757100 | 2.55918800  | 1.68574600  |
| H | -1.59791400 | 1.76812100  | 2.32524200  |
| C | -3.42723700 | 1.93601100  | -1.77183500 |
| H | -2.76356900 | 2.21034900  | -2.59017600 |
| H | -3.95978700 | 2.81287200  | -1.40391200 |
| H | -4.13720700 | 1.19687400  | -2.13914000 |

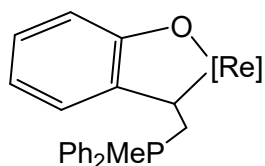

**2** ( $T_0$ )  
 $[\text{Re}] = \text{Re}(\text{PMePh}_2)\text{Cl}_3$

E = -3532.44215471 A.U.

|    |             |             |             |
|----|-------------|-------------|-------------|
| Re | -1.04282100 | -0.72510100 | -1.15557500 |
| Cl | 0.17798600  | -2.52858200 | -2.23641000 |
| Cl | -3.04039300 | -1.40158000 | -2.45047200 |
| Cl | -0.22322800 | 0.90017600  | -2.74700900 |
| P  | 3.06014400  | 0.06424500  | -0.47854400 |
| P  | -2.56596800 | 1.14001000  | -0.42186600 |
| O  | -1.63490300 | -1.95083200 | 0.33649200  |
| C  | 0.32391000  | -0.30905400 | 0.24233400  |
| C  | 0.15959300  | -1.01444200 | 1.49012300  |
| C  | -0.93784400 | -1.91496400 | 1.45429800  |
| C  | -1.25776900 | -2.70451100 | 2.56612000  |
| H  | -2.09711100 | -3.38559600 | 2.50467700  |
| C  | -0.49357400 | -2.58999000 | 3.71376600  |
| H  | -0.73455500 | -3.19754100 | 4.57870800  |
| C  | 0.58665500  | -1.69674600 | 3.77657100  |
| H  | 1.16982600  | -1.62010800 | 4.68635600  |
| C  | 0.90795900  | -0.91850100 | 2.67991200  |
| H  | 1.74889500  | -0.23795200 | 2.74701500  |
| C  | 1.44794800  | 0.69583700  | 0.14784900  |
| H  | 1.67091900  | 1.16435900  | 1.11056900  |
| H  | 1.20020800  | 1.49104300  | -0.55981300 |
| C  | 4.26538800  | 1.40552100  | -0.25083100 |
| C  | 4.35354200  | 2.07203500  | 0.97708800  |
| H  | 3.71165200  | 1.79235400  | 1.80290100  |
| C  | 5.26755500  | 3.10188300  | 1.15180800  |
| H  | 5.32582700  | 3.61072700  | 2.10602400  |
| C  | 6.10076100  | 3.48068200  | 0.10435400  |
| H  | 6.81074300  | 4.28724100  | 0.24110700  |
| C  | 6.01811700  | 2.82623900  | -1.11828600 |
| H  | 6.66130600  | 3.11998300  | -1.93851500 |
| C  | 5.10606400  | 1.79302600  | -1.29749300 |
| H  | 5.05185700  | 1.29900000  | -2.25804600 |
| C  | 2.95584000  | -0.33658600 | -2.23319400 |
| H  | 2.64716400  | 0.54076400  | -2.79938700 |
| H  | 2.19402900  | -1.10968600 | -2.36801900 |
| H  | 3.92162500  | -0.71081200 | -2.57318700 |
| C  | 3.63305200  | -1.41415100 | 0.39323000  |

|   |             |             |             |
|---|-------------|-------------|-------------|
| C | 4.75593200  | -1.38728000 | 1.22533000  |
| H | 5.31508300  | -0.47205700 | 1.36732600  |
| C | 5.16739500  | -2.54743000 | 1.86875000  |
| H | 6.03925500  | -2.52347300 | 2.51103800  |
| C | 4.46505500  | -3.73300500 | 1.68465700  |
| H | 4.78733500  | -4.63602900 | 2.18919100  |
| C | 3.35190400  | -3.76244800 | 0.85168700  |
| H | 2.80125100  | -4.68298800 | 0.70484700  |
| C | 2.93011300  | -2.61023900 | 0.20272300  |
| H | 2.05878600  | -2.65215900 | -0.44238200 |
| C | -3.96048100 | 0.72960200  | 0.70797300  |
| C | -4.42994900 | -0.58099700 | 0.81306800  |
| H | -3.93495300 | -1.37743400 | 0.27675100  |
| C | -5.53907600 | -0.86177600 | 1.60517500  |
| H | -5.89483100 | -1.88260300 | 1.67724000  |
| C | -6.18773400 | 0.15388900  | 2.29526100  |
| H | -7.05055700 | -0.07065700 | 2.91157800  |
| C | -5.72716300 | 1.46273600  | 2.19165700  |
| H | -6.22902900 | 2.26194700  | 2.72449400  |
| C | -4.62222700 | 1.74963700  | 1.40186100  |
| H | -4.27207800 | 2.77237700  | 1.33362400  |
| C | -1.67700500 | 2.49774700  | 0.44686900  |
| C | -1.22818800 | 3.62682900  | -0.24185400 |
| H | -1.43756100 | 3.74090100  | -1.29681300 |
| C | -0.49887900 | 4.61370500  | 0.41545700  |
| H | -0.16324700 | 5.48538600  | -0.13405600 |
| C | -0.20747700 | 4.48530600  | 1.76754500  |
| H | 0.35192000  | 5.25893500  | 2.28058300  |
| C | -0.64397200 | 3.35972200  | 2.46103800  |
| H | -0.42601200 | 3.25119300  | 3.51716500  |
| C | -1.36849500 | 2.37234000  | 1.80619500  |
| H | -1.70124900 | 1.50279900  | 2.35874100  |
| C | -3.42074900 | 1.96943300  | -1.81869300 |
| H | -2.69354200 | 2.27148700  | -2.56987800 |
| H | -3.99068100 | 2.82671300  | -1.45960500 |
| H | -4.08548900 | 1.23276900  | -2.26584700 |

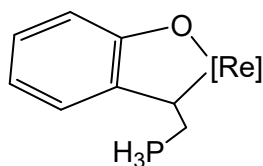

**M (S<sub>1</sub>)**

[Re] = Re(PH<sub>3</sub>)Cl<sub>3</sub>

E = -2529.27033847 A.U.

|    |              |              |              |
|----|--------------|--------------|--------------|
| Re | -1.517085325 | -0.941436806 | 0.040779258  |
| Cl | -1.432226826 | -1.161027818 | 2.557806565  |
| Cl | -3.697517938 | -0.079122271 | 0.426512510  |
| Cl | -1.760608850 | -3.309841613 | -0.161623458 |
| P  | 0.854611650  | -3.362031951 | 1.584301881  |
| P  | -1.959499087 | -0.701993197 | -2.259970869 |
| O  | -0.788112152 | 0.948002463  | -0.054402791 |
| C  | 0.507956045  | -1.171561737 | -0.039664418 |
| C  | 1.307717113  | 0.000000000  | 0.015952409  |
| C  | 0.489524319  | 1.164996081  | 0.037335542  |
| C  | 1.057357189  | 2.449949340  | 0.112476267  |
| H  | 0.410137594  | 3.317027781  | 0.134242824  |
| C  | 2.428267658  | 2.558030818  | 0.168574613  |
| H  | 2.882084225  | 3.540176984  | 0.234395948  |
| C  | 3.261299619  | 1.417423743  | 0.144266971  |
| H  | 4.336204158  | 1.541595799  | 0.184511261  |
| C  | 2.714348301  | 0.158943083  | 0.069240954  |
| H  | 3.372136361  | -0.702303085 | 0.047278512  |
| C  | 1.226177945  | -2.509463385 | -0.000582138 |
| H  | 2.309993119  | -2.433105675 | -0.099605244 |
| H  | 0.850324682  | -3.170075132 | -0.781149412 |
| H  | -0.209892226 | -2.650989539 | 2.290646266  |
| H  | -3.303450104 | -0.525792109 | -2.641927418 |
| H  | 0.625325517  | -4.724230780 | 1.370044030  |
| H  | 2.023176433  | -3.346536131 | 2.364079380  |
| H  | -1.377454982 | 0.393240549  | -2.933798044 |
| H  | -1.600609876 | -1.727253427 | -3.162168987 |

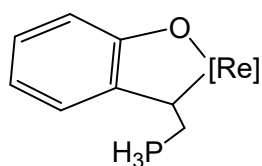

**M** ( $T_0$ )  
 $[\text{Re}] = \text{Re}(\text{PH}_3)\text{Cl}_3$

E = -2529.28740740 A.U.

|    |              |              |              |
|----|--------------|--------------|--------------|
| Re | 0.285462390  | -1.721103627 | 0.002840599  |
| Cl | 0.431722129  | -1.843733321 | 2.428594897  |
| Cl | -1.357200771 | -3.541829950 | -0.075846771 |
| Cl | 2.263384977  | -3.101800515 | -0.266382753 |
| P  | 3.293276823  | -0.495351829 | 1.817073684  |
| P  | 0.020420828  | -2.011763095 | -2.421984558 |
| O  | -1.215731906 | -0.373655616 | -0.003091846 |
| C  | 1.300565738  | 0.000000000  | -0.003251300 |
| C  | 0.511006502  | 1.195053917  | 0.001971972  |

|   |              |              |              |
|---|--------------|--------------|--------------|
| C | -0.881302723 | 0.899705326  | 0.001530575  |
| C | -1.833183588 | 1.927921152  | 0.007295748  |
| H | -2.885070772 | 1.672303618  | 0.009915729  |
| C | -1.398934397 | 3.239489909  | 0.021845274  |
| H | -2.127273428 | 4.042052836  | 0.032253083  |
| C | -0.028613664 | 3.553728560  | 0.025667484  |
| H | 0.283805207  | 4.590672320  | 0.033942817  |
| C | 0.914941416  | 2.547093184  | 0.016117963  |
| H | 1.966913212  | 2.811315328  | 0.007450111  |
| C | 2.796298641  | 0.119781695  | 0.170696880  |
| H | 3.195207717  | 1.135935583  | 0.094717705  |
| H | 3.341393524  | -0.526647339 | -0.522951794 |
| H | 3.157278848  | -1.874249054 | 1.957228117  |
| H | 0.163687369  | -3.325151113 | -2.890996192 |
| H | 4.652572804  | -0.191360459 | 2.000114737  |
| H | 2.629098237  | 0.152182700  | 2.857292686  |
| H | -1.239193143 | -1.669005152 | -2.940904269 |
| H | 0.852341538  | -1.324976014 | -3.330710846 |

## References

- [1] W. A. Skupiński, J. C. Huffman, J. W. Bruno and K. G. Caulton, *J. Am. Chem. Soc.* 1984, **106**, 8128-8136.
- [2] S. Verma, M. Kumar and A. K. Verma, *Org. Lett.* 2020, **22**, 130-134.
- [3] S. Chan, R. Lauchli, M. Leivers, S. Liehr, S. Pham, T. Ton and A. Villa, *PCT Int. Appl.* 2010, WO 2010081149 A1 20100715.
- [4] M. J. Frisch, G. W. Trucks, H. B. Schlegel, G. E. Scuseria, M. A. Robb, J. R. Cheeseman, G. Scalmani, V. Barone, G. A. Petersson, H. Nakatsuji, X. Li, M. Caricato, A. V. Marenich, J. Bloino, B. G. Janesko, R. Gomperts, B. Mennucci, H. P. Hratchian, J. V. Ortiz, A. F. Izmaylov, J. L. Sonnenberg, D. Williams-Young, F. Ding, F. Lipparini, F. Egidi, J. Goings, B. Peng, A. Petrone, T. Henderson, D. Ranasinghe, V. G. Zakrzewski, J. Gao, N. Rega, G. Zheng, W. Liang, M. Hada, M. Ehara, K. Toyota, R. Fukuda, J. Hasegawa, M. Ishida, T. Nakajima, Y. Honda, O. Kitao, H. Nakai, T. Vreven, K. Throssell, J. A. Montgomery, Jr., J. E. Peralta, F. Ogliaro, M. J. Bearpark, J. J. Heyd, E. N. Brothers, K. N. Kudin, V. N. Staroverov, T. A. Keith, R. Kobayashi, J. Normand, K. Raghavachari, A. P. Rendell, J. C. Burant, S. S. Iyengar, J. Tomasi, M. Cossi, J. M. Millam, M. Klene, C. Adamo, R. Cammi, J. W. Ochterski, R. L. Martin, K. Morokuma, O. Farkas, J. B. Foresman and D. J. Fox, *Gaussian 16, Revision A.03*, Gaussian, Inc., Wallingford CT, 2016.
- [5] a) A. D. Becke, *J. Chem. Phys.* 1993, **98**, 5648-5652; b) B. Miehlich, A. Savin, H. Stoll and H. Preuss, *Chem. Phys. Lett.* 1989, **157**, 200-206; c) C. Lee, W. Yang and R. G. Parr, *Phys. Rev. B.* 1988, **37**, 785-789.
- [6] a) F. Weigend and R. Ahlrichs, *Phys. Chem. Chem. Phys.* 2005, **7**, 3297-3305; b) F. Weigend, *Phys. Chem. Chem. Phys.* 2006, **8**, 1057-1065.
- [7] P. J. Hay and W. R. Wadt, *J. Chem. Phys.* 1985, **82**, 299-310.
- [8] a) P. v. R. Schleyer, C. Maerker, A. Dransfeld, H. Jiao and N. J. R. v. E. Hommes, *J. Am. Chem. Soc.* 1996, **118**, 6317-6318; b) Z. Chen, C. S. Wannere, C. Corminboeuf, R. Puchta and P. v. R. Schleyer, *Chem. Rev.* 2005, **105**, 3842-3888; c) H. Fallah-Bagher-Shaidaei, C. S. Wannere, C. Corminboeuf, R. Puchta and P. v. R. Schleyer, *Org. Lett.* 2006, **8**, 863-866.
- [9] a) R. Herges and D. Geuenich, *J. Phys. Chem. A.* 2001, **105**, 3214-3220. b) D. Geuenich, K. Hess, F. Kçhler and R. Herges, *Chem. Rev.* 2005, **105**, 3758-3772.
- [10] J. W. Storer, D. J. Giesen, C. J. Cramer and D. G. Truhlar, *J. Comput.-Aided Mol. Des.* 1995, **9**, 87-110.
- [11] C. M. Breneman and K. B. Wiberg, *J. Comput. Chem.* 1990, **11**, 361-373.
- [12] T. A. Keith, *AIMAll*, Gristmill Software, Overland Park KS, USA, 2017.
- [13] D. W. Szczepanik, *RunEDDB*, available at: <http://eddb.pl/runeddb/>.
- [14] D. W. Szczepanik, M. Andrzejak, K. Dyduch, E. Zak, M. Makowski, G. Mazur and J. Mrozek, *Phys. Chem. Chem. Phys.* 2014, **16**, 20514-20523.
- [15] a) T. Lu and F. Chen, *Acta Chim. Sinica* 2011, **69**, 2393-2406; b) T. Lu, F. Chen, *J. Comput. Chem.* 2012, **33**, 580-592.
- [16] W. Humphrey, A. Dalke and K. Schulten, *J. Mol. Graphics.* 1996, **14**, 33-38.
